# Supplementary material
Source: Royal Society of Chemistry journal article supplement (doi:10.1039/d5nr05431a)
Supplement: d5nr05431a1.pdf [file d5nr05431a1.pdf]

## Supporting Information

### Deep Oxidation of Single-Walled Carbon Nanotubes Toward a Versatile Platform for Direct Functionalization

Gudkov M.V.<sup>1\*</sup>, Novosadov N.I.<sup>1</sup>, Torkunov M.K.<sup>1</sup>, Rabchinskii M.K.<sup>2,3</sup>, Saveliev S.D.<sup>2</sup>, Kirilenko D.A.<sup>2</sup>, Svetlana I. Serebrennikova<sup>3</sup>, Dmitry V. Krasnikov<sup>4</sup>, Chumakov R.G.<sup>5</sup>, Albert G. Nasibulin<sup>4</sup>, Albert F Arutyunyan<sup>6</sup>, R.A. Novikov<sup>7</sup>, Melnikov V.P.<sup>1</sup>

<sup>1</sup> Semenov Federal Research Center for Chemical Physics, Russian Academy of Sciences, Moscow, Russia

<sup>2</sup> Ioffe Institute, Saint Petersburg 194021, Russia

<sup>3</sup> Advent, Ltd. 909, 28, Digital-ro 33-gil, Guro-gu, Seoul, 08377, Republic of Korea

<sup>4</sup> Skolkovo Institute of Science and Technology, Nobel 3, 121205, Moscow, Russia

<sup>5</sup> NRC "Kurchatov Institute", Akademika Kurchatova pl. 1, Moscow, 123182, Russia

<sup>6</sup> Engelhardt Institute of Molecular Biology of the Russian Academy of Sciences, Russia

<sup>7</sup> N.D. Zelinsky Institute of Organic Chemistry of the Russian Academy of Sciences, Russia

\*Corresponding author: [gudkovmv@chph.ras.ru](mailto:gudkovmv@chph.ras.ru)

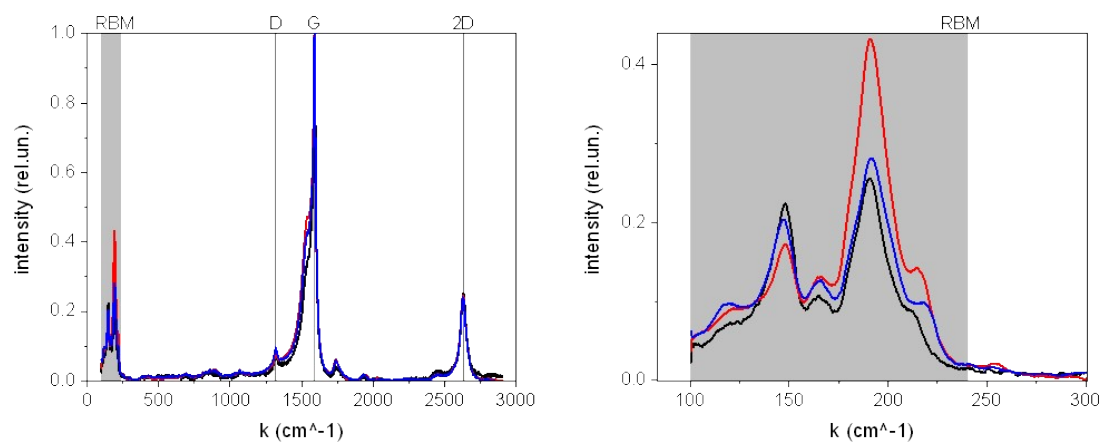

Fig. S1. Raman spectra of pristine SWCNT

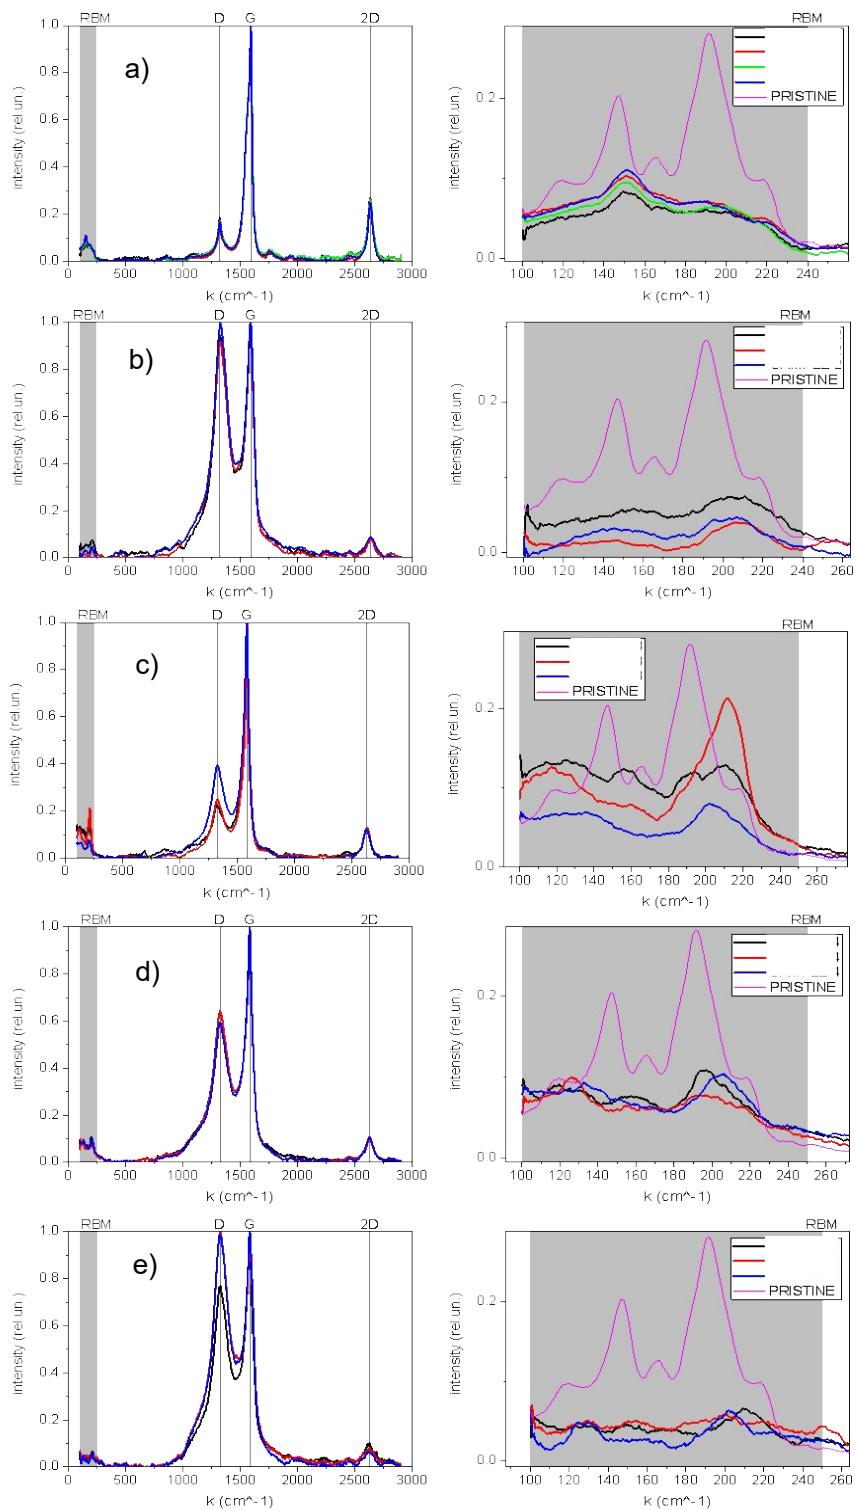

Fig. S2. Raman spectra of Mn\_OxCNT: a) Mn\_OxCNT-1, b) Mn\_OxCNT-3, c) Mn\_OxCNT-5, d) Mn\_OxCNT-7, e) Mn\_OxCNT-9

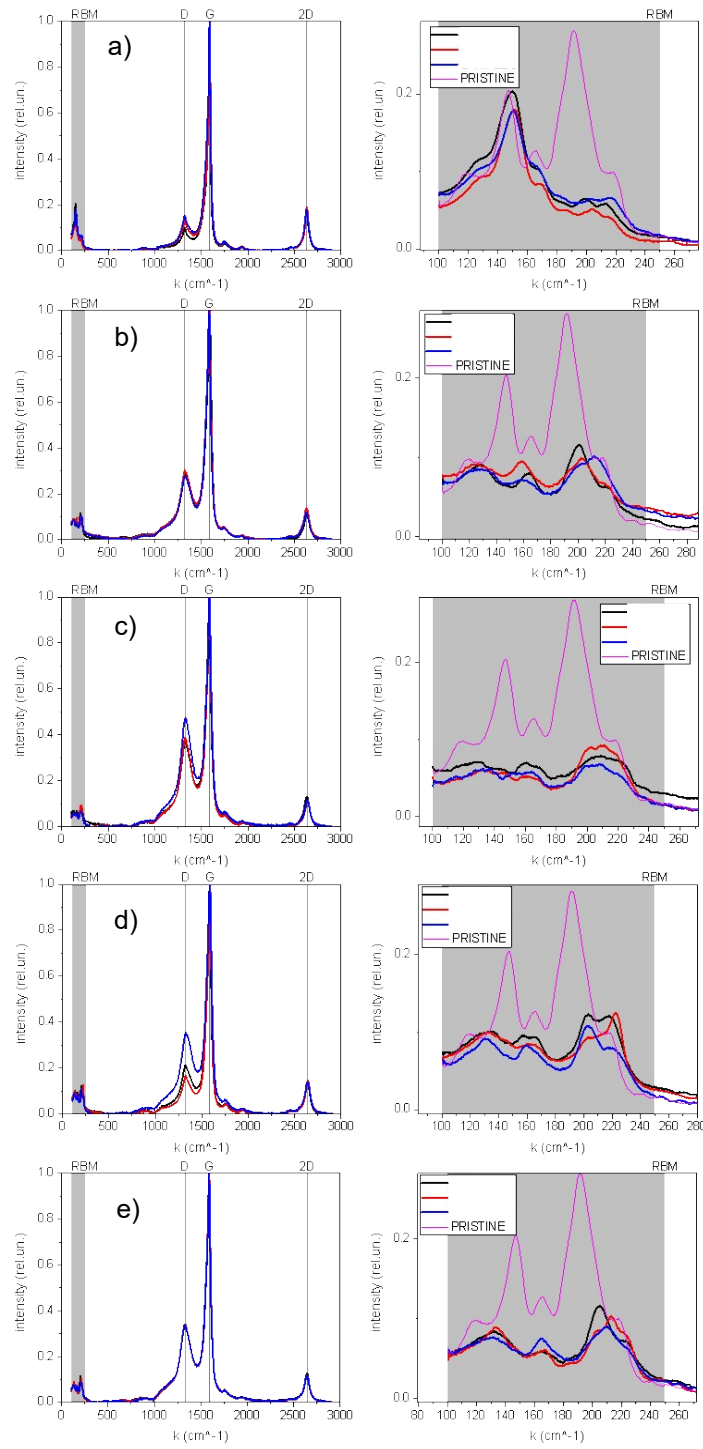

Fig. S3. Raman spectra of Cr\_OxCNT: a) Cr\_OxCNT-1 b) Cr\_OxCNT-3, c) Cr\_OxCNT-5, d) Cr\_OxCNT-7, e) Cr\_OxCNT-9

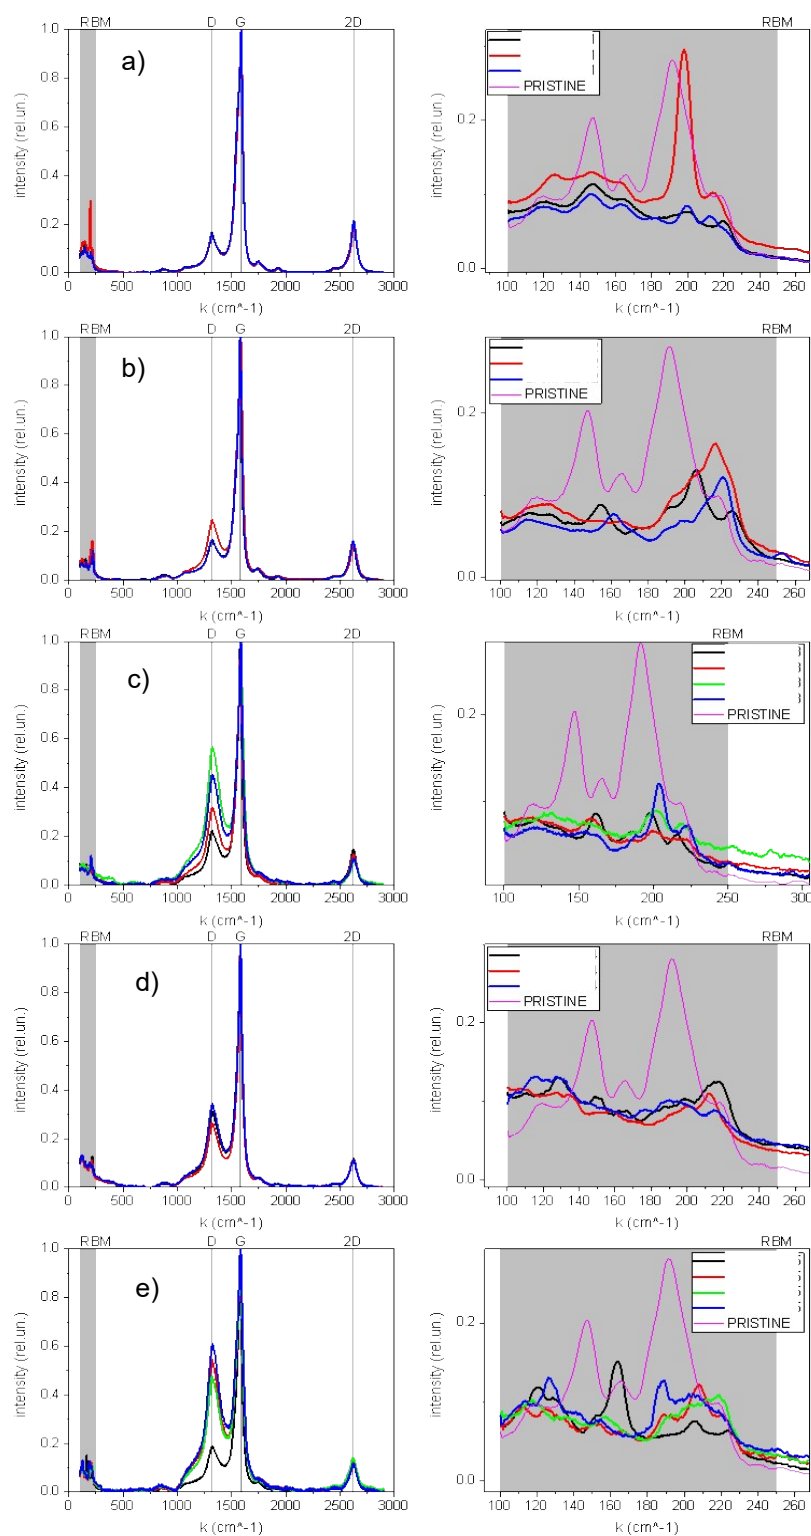

Fig. S4. Raman spectra of MnCr\_OxCNT: a) MnCr\_OxCNT-1, b) MnCr\_OxCNT-3, c) MnCr\_OxCNT-5, d) MnCr\_OxCNT-7, e) MnCr\_OxCNT-9
